# Supplementary material for: Poplar lignin structural changes during extraction in γ-valerolactone (GVL)
Source: Royal Society of Chemistry journal article supplement (doi:10.1039/d2gc03446h), 2022-12-06
Supplement: d2gc03446h1.pdf [file d2gc03446h1.pdf]

Supplementary Materials

**Poplar Lignin structural changes during extraction in  $\gamma$ -valerolactone (GVL)**

Feng Cheng,<sup>a,b</sup> Sarah Liu,<sup>b</sup> Steven D. Karlen,<sup>b</sup> Hoon Kim,<sup>b</sup> Fachuang Lu,<sup>b</sup> John Ralph,<sup>b,c</sup> Leida M. Vázquez Ramos,<sup>a,b</sup> George W. Huber<sup>\*a</sup> and James A. Dumesic<sup>a,b</sup>

<sup>a</sup> Department of Chemical and Biological Engineering, University of Wisconsin–Madison, Madison, WI 53726, USA.

<sup>b</sup> Department of Energy, Great Lakes Bioenergy Research Center, University of Wisconsin–Madison, Madison, WI 53726, USA.

<sup>c</sup> Department of Biochemistry, University of Wisconsin–Madison, Madison, WI 53726, USA.

\* Corresponding Author, E-mail: [gwhuber@wisc.edu](mailto:gwhuber@wisc.edu) (G.W. Huber)

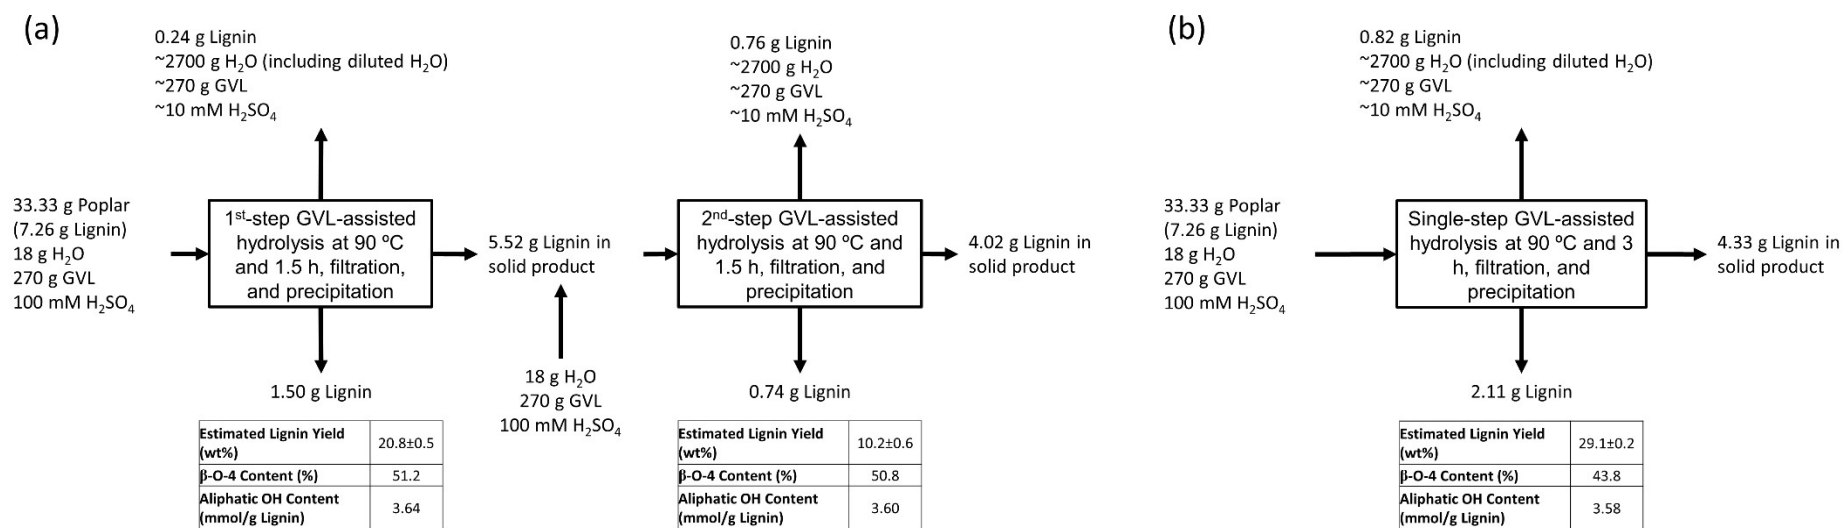

**Figure S1.** Process flow diagram of poplar GVL-assisted hydrolysis with corresponding lignin qualities in (a) two-step process at 90 °C and 1.5h and (b) single-step process at 90 °C and 3h.

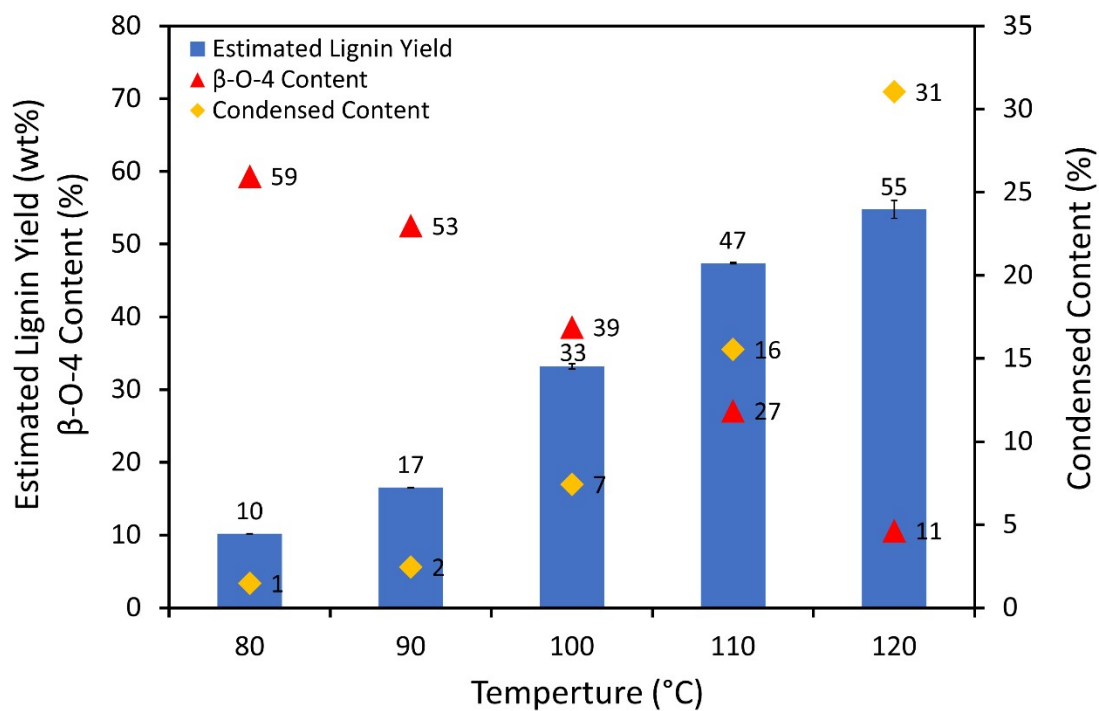

**Figure S2.** Lignin yields (poplar) were estimated on a basis of CASA-quantified lignin content in the extracted poplar. All data points were obtained in duplicates using 90wt.% GVL and H<sub>2</sub>O mixture (9:1, w/w) and 100mM H<sub>2</sub>SO<sub>4</sub> at 80–120°C and 1hr.

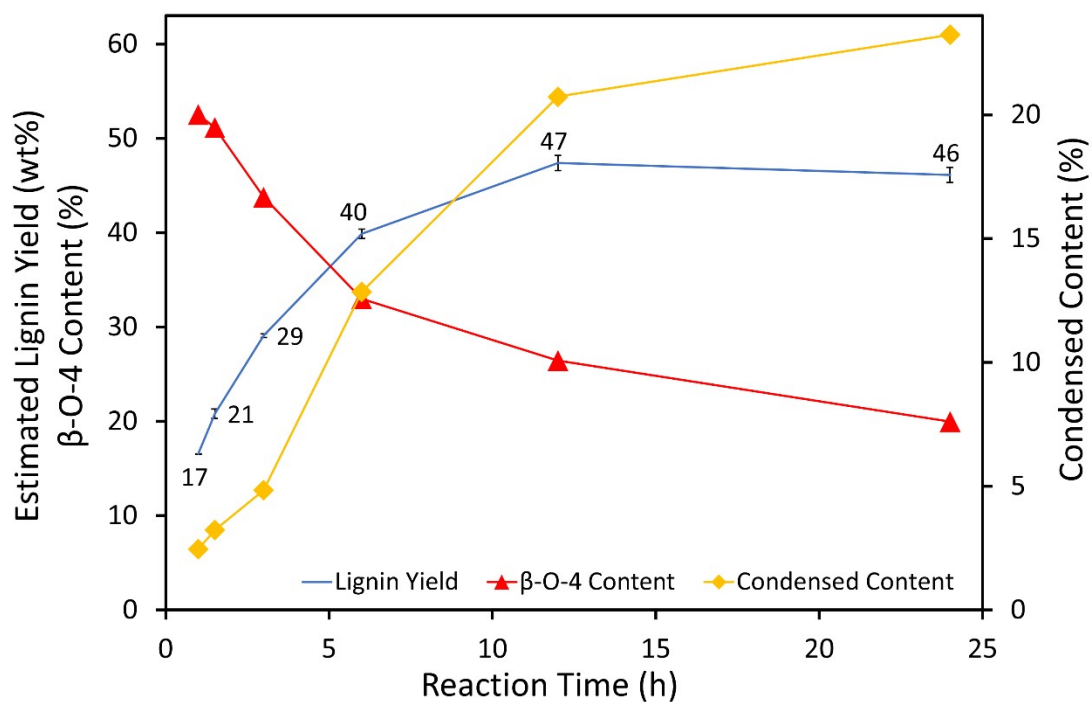

**Figure S3.** Lignin yields (poplar) were estimated on a basis of CASA-quantified lignin content in the untreated poplar. All data points were obtained in duplicates using 90wt.% GVL and H<sub>2</sub>O mixture (9:1, w/w) and 100mM H<sub>2</sub>SO<sub>4</sub> at 90 °C and 1–24h.

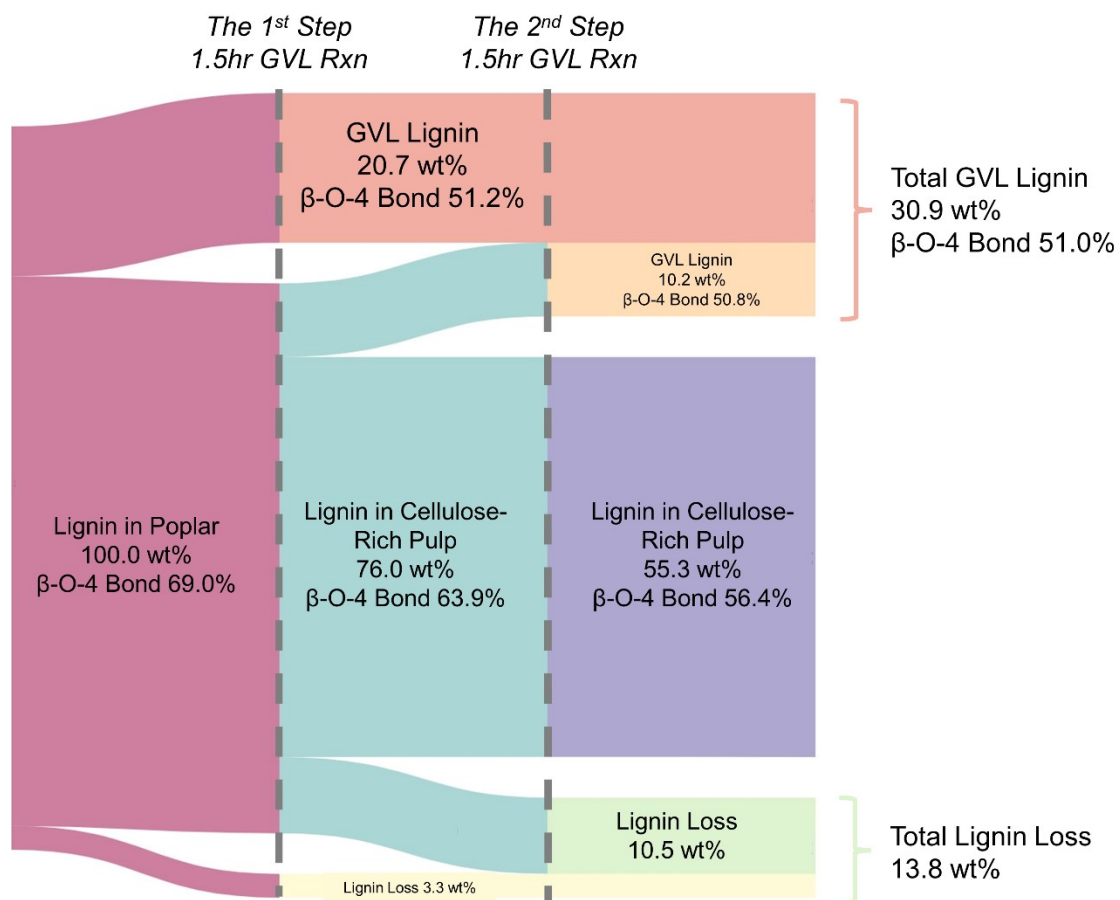

**Figure S4.** Sankey diagram of lignin mass balance during GVL pretreatment at 90 °C and 2 × 1.5 h, as measured by CASA-lignin analysis.

**Table S1.** Other primary types of bonds existed in GVL lignin.

|                                                  |           |            |           |            |            |            |
|--------------------------------------------------|-----------|------------|-----------|------------|------------|------------|
| <b>Temperature (°C)</b>                          | <b>80</b> | <b>80</b>  | <b>90</b> | <b>100</b> | <b>110</b> | <b>120</b> |
| <b>Time (h)</b>                                  | <b>6</b>  | <b>1</b>   | <b>1</b>  | <b>1</b>   | <b>1</b>   | <b>1</b>   |
| <b><math>\beta</math>-5 (%)</b>                  | 2.81      | 3.39       | 3.48      | 2.31       | 1.94       | 2.15       |
| <b><math>\beta</math>-<math>\beta</math> (%)</b> | 3.14      | 2.84       | 3.25      | 4.55       | 4.36       | 4.22       |
| <b>Temperature (°C)</b>                          | <b>90</b> | <b>90</b>  | <b>90</b> | <b>90</b>  | <b>90</b>  | <b>90</b>  |
| <b>Time (h)</b>                                  | <b>1</b>  | <b>1.5</b> | <b>3</b>  | <b>6</b>   | <b>12</b>  | <b>24</b>  |
| <b><math>\beta</math>-5 (%)</b>                  | 3.48      | 3.49       | 2.71      | 2.14       | 2.73       | 1.99       |
| <b><math>\beta</math>-<math>\beta</math> (%)</b> | 3.25      | 3.66       | 3.97      | 3.72       | 4.51       | 4.56       |

**Table S2.** The contents of different types of hydroxyl groups existed in the GVL lignin obtained in the 1 h reaction at different temperature.

| <b>Temperature (°C)</b>                             | <b>80</b> | <b>90</b> | <b>100</b> | <b>110</b> | <b>120</b> |
|-----------------------------------------------------|-----------|-----------|------------|------------|------------|
| <b>Aliphatic OH (mmol/g Lignin)</b>                 | 3.67      | 3.69      | 3.47       | 2.35       | 1.59       |
| <b>C<sub>5</sub>-substituted OH (mmol/g Lignin)</b> | 0.32      | 0.51      | 0.90       | 0.87       | 1.10       |
| <b>Guaiacyl OH (mmol/g Lignin)</b>                  | 0.52      | 0.47      | 0.46       | 0.47       | 0.51       |
| <b><i>p</i>-Hydroxyphenyl OH (mmol/g Lignin)</b>    | 0.64      | 0.60      | 0.64       | 0.46       | 0.32       |
| <b>Carboxylic acid OH (mmol/g Lignin)</b>           | 0.41      | 0.37      | 0.29       | 0.28       | 0.15       |

**Table S3.** The contents of different types of hydroxyl groups existed in the GVL lignin obtained in the 90 °C reaction for different reaction times.

| <b>Reaction Time (h)</b>                            | <b>1</b> | <b>1.5</b> | <b>3</b> | <b>6</b> | <b>12</b> | <b>24</b> |
|-----------------------------------------------------|----------|------------|----------|----------|-----------|-----------|
| <b>Aliphatic OH (mmol/g Lignin)</b>                 | 3.69     | 3.64       | 3.58     | 3.48     | 2.99      | 1.90      |
| <b>C<sub>5</sub>-substituted OH (mmol/g Lignin)</b> | 0.51     | 0.50       | 0.81     | 1.05     | 1.23      | 1.23      |
| <b>Guaiacyl OH (mmol/g Lignin)</b>                  | 0.47     | 0.48       | 0.36     | 0.52     | 0.52      | 0.41      |
| <b><i>p</i>-Hydroxyphenyl OH (mmol/g Lignin)</b>    | 0.60     | 0.67       | 0.62     | 0.62     | 0.56      | 0.31      |
| <b>Carboxylic acid OH (mmol/g Lignin)</b>           | 0.37     | 0.43       | 0.34     | 0.37     | 0.34      | 0.24      |
